# Supplementary material for: A two‐part, single‐arm, multicentre, phase I study of zanubrutinib, a selective Bruton tyrosine kinase inhibitor, in Chinese patients with relapsed/refractory B‐cell malignancies
Source: PubMed Central journal article supplement — Br J Haematol. 2022 Apr 5;198(1):62–72. doi: 10.1111/bjh.18162 (PMC9321909; doi:10.1111/bjh.18162), 2022-04-05
Supplement: BJH-198-62-s001.pdf [file BJH-198-62-s001.pdf]

## Supporting Information

**Table S1.** Time to response in Chinese patients with relapsed/refractory B-cell malignancies.

| <b>Response Category</b>  | <b>CLL/SLL<br/>(n=9)</b> | <b>MCL<br/>(n=2)</b> | <b>WM<br/>(n=2)</b> | <b>FL<br/>(n=26)</b> | <b>MZL<br/>(n=5)</b> | <b>Total<br/>(N=44)</b> |
|---------------------------|--------------------------|----------------------|---------------------|----------------------|----------------------|-------------------------|
| Time to response, months* |                          |                      |                     |                      |                      |                         |
| <i>n</i>                  | 9                        | 1                    | 1                   | 12                   | 0                    | 23                      |
| Median                    | 2.8                      | 2.8                  | 2.8                 | 2.8                  |                      | 2.8                     |
| Min, max                  | 2.7–2.9                  | 2.8–2.8              | 2.8–2.8             | 2.6–16.4             |                      | 2.6–16.4                |

\*Time to response is summarized for responders (ie, those who achieved an overall response) only.

**Table S2.** Patients with AEs leading to dose interruption.

| <b>Patient number</b> | <b>AE leading to dose interruption</b>      | <b>Outcome</b> | <b>Recurrence after restarting treatment<br/>(Yes/No/ Not available)</b>                                    |
|-----------------------|---------------------------------------------|----------------|-------------------------------------------------------------------------------------------------------------|
| 1                     | Grade 3 cholesterin granuloma of middle ear | Resolved       | No                                                                                                          |
| 2                     | Grade 4 neutropenia                         | Resolved       | Yes, recurred 3.5 months after treatment re-initiation. But latter event resolved without dose interruption |
| 3                     | Grade 3 febrile neutropenia                 | Resolved       | No                                                                                                          |

|   |                                            |                                                                          |                                                                                         |
|---|--------------------------------------------|--------------------------------------------------------------------------|-----------------------------------------------------------------------------------------|
| 4 | Grade 3 purpura                            | Resolving                                                                | Not available. Treatment was not restarted due to disease progression                   |
| 5 | Grade 2 cough and Grade 1 productive cough | Resolved                                                                 | No                                                                                      |
| 6 | Grade 3 anemia                             | Resolving                                                                | Not available. Treatment was not restarted due to disease progression                   |
| 7 | Grade 1 leukopenia and Grade 3 neutropenia | Grade 1 leukopenia didn't resolve, and Grade 3 neutropenia was resolving | No. Treatment was discontinued very soon after re-initiation due to disease progression |
| 8 | Grade 3 anemia                             | Resolved                                                                 | Not available. Treatment was not restarted due to disease progression                   |

**Figure S1.** Mutational landscape of 14 zanubrutinib-progressive patients. A NGS panel that included 175 hematological malignancy-related genes, and a NGS panel containing 475 lymphoma-related genes were tested in 3 and 11 samples, respectively. All the genes listed in the heatmap were detectable by the lymphoma-related genes panel; three genes (*ATP6V182*, *CYLD*, *DDX3X*) were not included in the hematological malignancy-related genes panel. BOR, best
